# Supplementary material for: RNAseq analysis of bronchial epithelial cells to identify COPD-associated genes and SNPs
Source: BMC Pulm Med. 2018 Mar 5;18:42. doi: 10.1186/s12890-018-0603-y (PMC5838965; doi:10.1186/s12890-018-0603-y)
Supplement: Supplementary file 1 — Tables S1, S2, S3, S4, S5 and S6. Table S1. This table provides: a) Gene-specific assay information including SNP sites, primer and internal standard sequences, b) Subject-specific demographic information, and c) assay- and subject-specific transcript abundance values (target gene molecules/106 ACTB molecules). Table S2. Population used for allele specific expression analysis: Summary demographic characteristics of the study population of allele specific expression (subject total n = 180). Table S3. Transcription factor-target inter-gene correlation in Control, COPD, or All subjects (p-value < 0.05). Table S4. Analysis of covariance (ANCOVA). Gene expression values (Independent Variables) significantly correlated (positively or negatively) with COPD subjects (Dependent Variable) after control for expression values of other genes (Covariates). Table S5. ERCC5 SNPs linked to rs17655 and rs873601 (D > 0.95) and with p < 0.05 in LHS and COPDgene NHW CB cohorts. COPD GWAS p-values, population-specific genotype frequencies, and epigenetic annotation information from Haploreg/Encode. Table S6. Haplotype structure between COPDgene NHW1 associated SNP rs4150275, putative functional cis-rSNP rs873601, and DAE2 SNP rs17655. (XLSX 109 kb) [file 12890_2018_603_MOESM1_ESM.xlsx]

## Sheet: Table S1
Table S1. This table provides: a) Gene-specific assay information including SNP sites, primer and internal standard sequences, b) Subject-specific demographic information, and c) assay- and subject-specific transcript abundance values (target gene molecules/106 ACTB molecules).
									Subject Characteristics	Demographic Characteristics
									UT Subject #	3028	4017	2007	6009	3041	3044	3071	1047	2003	4004	1077	1041	3056	1046	3072	3073	3070	3079	3062	3066	1082	3051	3086	1042	10011	1038	1067	1060	1045	5022	3018	5023	2028	10006	1073	1066	1074	3063	1021	1016
									Phenotype	Control	Control	Control	Control	Control	Control	Control	Control	Control	Control	Control	Control	Control	Control	Control	Control	Control	Control	Control	Control	Control	Control	Control	Control	Control	Control	Control	Control	Control	Control	COPD	COPD	COPD	COPD	COPD	COPD	COPD	COPD	COPD	COPD
									Clinical COPD	NO	NO	NO	NO	NO	NO	NO	NO	NO	NO	NO	NO	NO	NO	NO	NO	NO	NO	NO	NO	NO	NO	NO	NO	NO	NO	NO	NO	NO	NO	STAGE 4	STAGE 3	STAGE 3	STAGE 3	STAGE 2	STAGE 3	STAGE 1	STAGE 3	STAGE 3	STAGE 3
									Age	79	78	76	73	55	73	70	68	68	67	66	66	66	65	65	57	64	57	62	62	61	61	57	61	60	59	59	59	58	58	60	68	75	70	52	69	55	56	65	62
									Sex	Male	Male	Female	Female	Male	Female	Female	Male	Male	Male	Female	Female	Female	Female	Female	Female	Female	Female	Male	Female	Male	Female	Female	Female	Female	Female	Male	Male	Female	Male	Female	Male	Male	Male	Male	Female	Male	Male	Male	Male
									Ethnicity	White	White	White	White	White	White	White	White	White	White	White	White	White	White	White	White	White	AA	White	White	White	White	White	White	White	White	White	White	White	AA	White	White	White	AA	White	White	White	White	White	White
									Smoking Status	FORMER	FORMER	FORMER	CURRENT	CURRENT	FORMER	FORMER	FORMER	FORMER	FORMER	FORMER	FORMER	FORMER	FORMER	FORMER	FORMER	FORMER	FORMER	CURRENT	CURRENT	CURRENT	FORMER	CURRENT	CURRENT	CURRENT	FORMER	CURRENT	FORMER	CURRENT	FORMER	FORMER	FORMER	FORMER	FORMER	CURRENT	FORMER	CURRENT	CURRENT	FORMER	FORMER
									Pack Year	90	42	21	120	38	37	26	88	41	30	70	65	21	52	29	26	35	23	66.04	33	104	45	43	39	25	74	43	26	63	45	74	63	54	45	46.73	68	32	45	94	47
									Worst FEV1/FVC	0.786096	1	0.891892	0.701068	0.841969	0.831325	0.814229	0.804598	0.877778	0.787129	0.725275	0.731405	0.834101	0.984252	0.781145	0.796791	0.727273	0.87395	0.813559	0.731034	0.77918	0.768924	0.773723	0.709302	1	0.747748	0.765396	0.779456	0.930876	0.716931	0.25	0.197917	0.252066	0.593074	0.457143	0.513158	0.655446	0.417445	0.597403	0.369963
Gene and Assay Characteristics						SLDA Modeling			FEV1%	79	100	77	92	102	102	117	98	71	84	95	74	95	108	130	118	115	96	110	113	87	93	82	65	13	100	83	88	112	75.1	26	30	37	37	58	42	116	41	42	49
Gene Name	Reference in Additional file 1	Function	Forward Primer	Reverse Primer	Internal Standard	CAT score	Ranking	% Missing value	Target gene molecules/106 ACTB molecules). Bold: Features in one or both classifiers
KEAP1	39	AO	CGCCGGTGCTTCATGGGGGC	GCTGCTGGGGGCTATGATGGTC	CGCCGGTGCTTCATGGGGGCTACGAAAGTCCACGTCTCTGTCTCCGCACCGCAGCTCTACACGCTGTTCAGCTGGTCCTGACCATCATAGCCCCCAGCAGC	3.35376	1	0.0833333	KEAP1	4.55471	4.69349	4.54363	4.74562	4.8068	4.31147		5.43329	4.6001	4.97647	4.86727	4.69741	5.29031		4.57743			4.40961	4.96118	5.05986	4.78671	4.5245	4.84485	4.57553	4.85371	4.539	4.74583	4.82515	4.75878	4.69976	4.64909	4.43004	4.63292	4.671	5.0323	4.54145	4.88034	4.7144	4.19549	4.84129
GPX1	20	AO	GTTTCCTCTAAACCTACGAGGGAG	CCTTGGTCTGGCAGAGACTGGG	GTTTCCTCTAAACCTACGAGGGAGGAACACCTGATCTTACATAAAGTAACAACTCTAGGTGGGTGCTGGTCCTGTTGATCCCAGTCTCTGCCAGACCAAGG	3.31971	2	0.05	GPX1	5.69633	5.91144	6.21462	6.28957	5.81331	5.29775	5.29911	5.53021	5.34361	5.74683	6.64299	5.47356	5.48587	5.48951	5.9565	5.91163	5.15614	5.66291	6.00773	5.4873	5.48398	5.52005	5.82293	5.89246	5.50791	5.49922		5.74334	5.77137		5.48957	6.11059	6.40287	5.84109	7.02226	6.39917	5.78424	6.25628	5.62835	5.93731
CEBPG	8, 25, 26, 33, 34, 56, 58, 59	TF	GAGGTCTACTGTCCTGCATTGTC	GATTTGTTTCTTGAGCATGCACACA	GAGGTCTACTGTCCTGCATTGTCGCCATCTGCTGTCGTATTCTCATTGATAGTGGGCTTTACGTTGTCTGCAAGGTTGTGTGCATGCTCAAGAAACAAATC	2.97894	3	0.183333	CEBPG	4.47887	3.84123	5.5628	4.83077	5.22782	4.84113	4.71718	4.54232	4.71806	4.39819	4.68708	4.2768	4.41211	4.34859					4.63781	4.303	3.08452	3.99104	4.71828	4.18621	3.73566	4.92907	5.04436		4.1807			4.91798	5.23463	5.08978	4.90784	4.78962	4.57632	4.91577		5.31
XPA	14	DNAR	GCGTGCAGTGCGCGTGCGTG	TGCTCTAAAGCCGCCGCCTCC	GCGTGCAGTGCGCGTGCGTGGAGCTGGGAGCTAGGTCCTCGTAGTTGGACGTAGACGGAGGCGGCCGACGGGGCTTTGCCGGAGGCGGCGGCTTTAGAGCA	2.64402	4	0.283333	XPA	4.00184		4.95047	3.9294	4.31401	3.4088	4.00356	4.12158		3.4826	2.85285	3.51456	4.27069	3.80617	4.5106			4.22354	3.20667	3.68108	4.47942	4.0797	4.21596	4.0921	4.1966	3.7787	5.54868		4.2422	4.61861		3.64249	4.24493	3.66241		3.14565	4.11636	4.15213		4.20123
CAT-2	43	AO	CGGCTGTCAGCCATAGCGTGC	TTTGCCTGCTGAGGGTGGAGAC	CGGCTGTCAGCCATAGCGTGCGGTTTGCTGTGCCGAACACTTCAGTAGTCCCCGGATCTTGGGTCTCCACCCTCAGCAGGCAAA	2.64054	5	0.216667	CAT-2	3.66653	2.85201	3.77152	4.09731	3.93399	3.71044		4.0007		3.82131	4.4156	3.29617		4.04729				4.14632	4.06252	4.01995	4.31464	3.83851		4.07829	3.25389	4.42355	4.40697				4.12395	4.38609	4.31191	3.52929	5.06107	4.64387	4.23277	3.35988		4.35891
TP73-2	71	CCC/DNAR	ATCACCATCCCCAACCGCGGC	TTGATGGGCTGCTTGCGGGCC	ATCACCATCCCCAACCGCGGCGGCCCAGGCGGCGGCCCTGAAGAGCGGTCGTACTCCGTCTTCGACCTGCCCGACTGCAAGGCCCGCAAGCAGCCCATCAA	2.29649	6	0.283333	TP73-2	4.03388	3.3596	4.08875	4.43857	4.29552	3.59643		3.23948			3.55137	4.34131					5.24711		3.36939	4.50114	3.14009			3.82151						3.8506	4.72628	4.06571	4.4524	4.14436	4.61865	3.56605		4.21497	3.5384	4.58854
TP53	9, 48, 49		CCCTCTCCCTGTTGGTCGGTG	CAGACAGGGTTTGGCTGGGCC	CCCTCTCCCTGTTGGTCGGTGGGTTGGTAGTTTCTACAGTTTGGCGGCCGGCTAGTTATAGGGAGTTGTCAAGTCTCTGCTGGCCCAGCCAAACCCTGTCTG	2.11477	7	0.166667	TP53	4.88846	4.50578	5.03239	5.11997	5.08741	3.74528	4.46783	4.28069		4.54215		4.67957		5.24611				4.54837	4.38331	4.3466	5.18582	5.77189	5.56008	4.58815	5.14885	4.73113	4.63131		4.18969	4.74184		4.28708	4.51406	4.73742		4.93989	4.70136	4.63597	4.94493
CDKN1A-4	28, 29, 49, 54, 62		TTTTCCCTCTTTGGCTCCCCTGT	CAAGGGGGAGGGACAGCAGCA	TTTTCCCTCTTTGGCTCCCCTGTACCTTTTGAGGAGCCCCATCTAACCCTCCTCTACATCTGGGCTCTGCAATTCCCCTCTGCTGCTGTCCCTCCCCCTTG	2.07854	8	0.0666667	CDKN1A-4	4.86556	4.99451	5.21706	5.20415	4.95746	4.52417	4.54073	4.70212		5.07608	4.4329	4.95368	4.14444	4.63708		4.81065		5.01624	5.42528	5.06267	5.57898	5.07589	4.98961	4.55246	4.16871	4.80257	4.83726	5.07282	4.29465	5.02862	5.04669	5.30719	5.45024	4.84084	6.05289	5.40605	4.8543	5.09213		5.54115
GSTM1	37, 38		GCAGGCCCTTTGAAGCCTCAGC	AACAGGAAGGAAGGTCAGGCTGG	GCAGGCCCTTTGAAGCCTCAGCTACCCACTATCCTTCGTGAGCATACCATCACATAATCACCCTTCCCTGCACTAAAGCCAGCCTGACCTTCCTTCCTGTT	1.45423	9	0.0833333	GSTM1	4.61079	4.61369	3.84465	4.40751	4.59033	4.07994		4.91013		4.49204	4.87564	4.29859	4.90311	4.14628	4.57093	5.02455		4.81172	4.7651	4.90557	3.60912	4.75999	4.88376	4.7483	5.28357	4.49607	4.71315	5.00793	4.42389	4.89631	4.34721	4.46416	4.6344	5.11054	5.09165	4.65323	4.65917	4.21382	4.07719	4.46548
TP53-2	9, 48, 49		GGGCTGGTGCAGGGGCCGC	TGAAGACCCAGGTCCAGATGAAG	GGGCTGGTGCAGGGGCCGCCGGTGTAGGAGCTGCTGGTGCATGGGACAAGGTGGGGGCGGCCTCTGGCATTCTGGGAGCTTCATCTGGACCTGGGTCTTCA	1.3497	10	0.116667	TP53-2	4.88512	4.70234	4.65972	5.0832	5.02892	4.0233		4.28963		5.29416	4.85757		4.78701		4.45755	4.84306		4.56298	5.03495	3.86503	4.79122		4.69231		4.15724	4.52536	4.69312	3.44718	3.83018	4.92609	5.00838	4.2788	4.8236	4.07985	4.98308	4.2831	4.72781	4.80605	4.48622	4.88192
CEBPD	33, 34, 55, 57		CTCCGGCAGTTCTTCAAGCAGC	TGCTGAGTCTCNCCCGCCCCG	CTCCGGCAGTTCTTCAAGCAGCTGCCCAGCCCGCCCTTCCTTCCGTCCTCCCGGAAAGAAGACTGCCGGTAACGCGCGGCCGGGGCGGGNGAGACTCAGCA	1.34218	11	0.216667	CEBPD	3.46606	3.96938	4.24903	4.22164	3.8052	2.9496		3.38708		3.52981	3.78237	4.90534	3.79611				5.06301		3.59026	3.63924	4.54526	4.13068		4.0138		4.47594	4.48137	4.17989		3.51226		4.47691	4.43117	3.98414	5.11284	4.35223	4.19923	4.3385		4.78665
XRCC1	36, 40		CTCATCTTTCATGTCCCCTTCCG	GCTTCTCGGCGGCTGCCCGG	CTCATCTTTCATGTCCCCTTCCGAGAGCCGCAGTGGCTCAAGCCCAAAACGAGTTAGCGTGTTTGGGCCTGACAAGCTGGTCCGGGCAGCCGCCGAGAAGC	1.26114	12	0.0666667	XRCC1	4.84315	4.29666	4.56978	4.48559	4.29907	3.75921	4.18304	4.96611	4.41244	4.81274	5.10159	4.95964	4.66051	4.82654		5.03106		4.19037	4.68873	4.51011	3.45826	4.63068	4.46182	3.50773		4.6939	4.70751	4.59327	4.01414		4.51428	4.44503	4.7162	4.71676	4.31228	4.77594	4.61578	4.39064	4.18832	4.38367
ERCC1	14		ATTCAGAGTCTGGGGAGGAGGC	TTAGTTCCTCAGTTTCCCGGGGG	ATTCAGAGTCTGGGGAGGAGGCTCCCACAGGCCGGGACAAGGAGCTGAGGGGGCATCATCAGCAGCCTGTGTAGTCTGCCCCCGGGAAACTGAGGAACTAA	0.981987	13	0.05	ERCC1	4.45795	4.16271	4.36797	4.52307	4.53356	3.96791	3.58192	4.67141	3.86191	4.71429	4.4847	4.02074	4.29744	4.74065		4.33612		4.0067	4.38434	3.89214	4.00011	4.23463	4.82894	4.2908		3.94673	5.14175	4.1437	4.08239	4.97055	4.83589	4.06931	4.317	4.2657	4.46073	4.66412	4.23949	4.42071	4.28905	4.69262
KEAP1-2	39		AGGAAGTCACTGCAGGCACGGA	ACGGCCTCCATCTCCATGGGC	AGGAAGTCACTGCAGGCACGGACAACGCTGTCGATCTGGTAAATGGCATCAACGTCCACGACGTGGAGGACACACTTCTCGCCCATGGAGATGGAGGCCGT	0.963648	14	0.116667	KEAP1-2	4.13515	3.74358	4.07554	4.2163	4.17686	3.6874	4.61721	4.44081	5.12946	4.256	4.66335	4.03701	4.23963			4.27858	4.15831		4.28721	3.39303	3.6062	3.72089	3.86554			4.00781	4.21527		3.88943	4.57351	3.9621	4.18953	4.2927	3.96194	4.46354	3.83996	3.87608	4.20313	3.70381	4.00654
TP63	61-62, 65-70		TGTATGAGTAGCCAGGGTAAGGG	CTAACTGCATTGAGCTGAGGCCA	TGTATGAGTAGCCAGGGTAAGGGGTAAAAGGATAGTAAGCACAGAGACAACCAGAGAGCGGGCTTAATGGAGTTCTTGTGGCCTCAGCTCAATGCAGTTAG	0.787368	15	0.1	TP63	4.60602	3.03345	4.70049	4.4054	4.9837	4.84519	5.15368	5.17595		4.62358	5.18369	4.40478	4.9725	5.02114	5.94529	4.99607		4.61734	4.81672	4.80305	4.29692	4.53591	4.81154	4.22498	4.8778	5.13701	4.07517	4.68564	4.70137		4.38069	4.40981	5.23216	4.54994	4.92692	5.21022	4.61479	4.98309		4.88215
GSTP1	20, 37, 38, 43, 51, 53		GGCTGCCTGGATGCGTTCCCC	AGGTTCACGTACTCAGGGGAGG	GGCTGCCTGGATGCGTTCCCCCTGCTCTCAGCATATGTGGGTCGCATCGGTTCCCTGCACAAGCTCAAGGCCTTCCTGGCCTCCCCTGAGTACGTGAACCT	0.703859	16	0	GSTP1	5.81845	5.90617	6.41523	6.35352	6.36063	5.79199	6.57977	5.93173	5.35458	5.87359	5.87753	5.61993	6.29174	6.88342	6.90383	6.43579	6.41599	6.58235	6.86267	6.15613	6.5027	6.27855	6.70149	6.41714	5.77374	6.26858	6.8331	6.35756	6.42742	6.72224	6.37545	6.29885	6.3808	6.35671	6.66646	6.23726	6.22869	6.656	6.01807	6.17263
CDKN1A-3	28, 29, 49, 54, 62		CACTTGTCCGCTGGGTGGTACC	AGGTCTGAGTGTCCAGGAAAGGG	CACTTGTCCGCTGGGTGGTACCCTCTGGAGGGGTGTGGCTCATTCACACCGATGTAACGGGCGGTTATGAAATTCACCCCCTTTCCTGGACACTCAGACCT	0.662167	17	0.0666667	CDKN1A-3	3.94151	4.38093	4.42029	4.51915	4.53111	4.87055	3.96311	4.71958	4.67944	4.57445	5.1566	4.54379	4.6831			4.50428		4.27418	5.01206	4.47696	4.57352	4.44399	4.95295	4.1045	4.52875	4.76585	4.96653	4.66719	4.61326	4.77122	4.36848	4.56519	5.11813	4.2608	4.24562	4.68727	4.59008	4.82522		4.47674
MUC5B-2	12		CAACGTGCGTGTGCTTTGCTGTG	TCCAGGTCGTCCCCGGAGTTG	CAACGTGCGTGTGCTTTGCTGTGACGACTACAGCCACTGCCACAGCACACGGGCCGCCGGCTCCACGGCCACGCCCTCCTCAACTCCGGGGACGACCTGGA	0.631063	19	0.116667	MUC5B-2	5.3023	6.366	4.79024	5.51699	5.26724	5.60943		5.78305	5.78617	7.46918	6.04134	5.79731	7.38165	5.5477					4.58057	5.59246	5.47115	5.82562	5.4648		4.05659	5.81994	4.90181	5.80193	4.98443	7.15693	5.82293	5.46841	5.98111	6.76476	5.79704	6.25163	5.10461	5.54941	6.20373	5.65282
TFE3	13		AGGGCAAGAGGATGAAGGAAGGGG	TACAACCCTCCTCCAAGCTTCTGCC	AGGGCAAGAGGATGAAGGAAGGGGCTGTCCCGGGGCCTACCCGGCCAAGGAAAAACTGGAAGCCTTCCCCCAGCAAGGCAGAAGCTTGGAGGAGGGTTGTA	0.623177	18	0.0666667	TFE3	4.33275	4.19504	4.96928	4.48815	4.61646	4.14996	5.23012	4.32042		4.86207	4.17831	4.25345	4.95585	4.1542	4.42796				5.09711	4.42064	4.50779	4.39937	4.62136	4.61986	4.77617	4.3715	4.7769	3.62267	4.27216	5.09704	4.55549	4.57735	4.3344	4.2589	4.60902	4.69659	4.62093	4.38177	4.27552	4.60843
GSTT1	37, 38		GGGATGGTGGCTTCGGGAGGT	CATTTCTAATGGCCCATGGGAGC	GGGATGGTGGCTTCGGGAGGTGAGGTGCTCTGGGACTTGGGAAAGCCTCAGTCAATCCGTTCCTGCTTTCTGGGCCTGGCTCCCATGGGCCATTAGAAATG	0.493131	20	0.133333	GSTT1	3.85888	4.11018	4.13855	4.34849	4.32257	4.52534	6.3336	4.63801		4.01249	4.17782	3.92245	4.57387	4.12537	4.07521	4.44282	4.87435	3.97406	4.657	4.81824		4.21102	4.61918	4.6842	5.02737			4.37785	4.19092	4.84081	3.74777	4.42021	4.42861	4.26018	5.05303		4.54261	4.69672	3.74847	4.41389
MUC5B	12		GTGGGGACCACCCGCACCCC	CCAGTGGGTCTCAGGGTGGTG	GTGGGGACCACCCGCACCCCTGCAGTGCTCCCCAGCAGCCTTCCAGCCCTCGGCGCGTACACTGTGTCCTCCTCAGTCCTCACCACCCTGAGACCCACTGG	0.423182	22	0.05	MUC5B	4.94947	5.84487	4.17793	5.1059	4.17195	4.87447	5.50846	5.23023	5.12242	5.82843	5.03531	5.51652	5.23129	5.41028		4.87619	5.20297	4.52021	4.21425	5.00293	4.00102	5.81965	4.92358			5.36873	4.54962	5.19496	4.13349	6.22228	5.16881	5.1661	5.45476	5.61996	4.83654	5.9846	4.62984	5.19982	4.77456	5.8149
TP73	71		AAGACATGCCCCATCCAGATCAAG	ACGTCGGTCACGTGCTCCGCT	AAGACATGCCCCATCCAGATCAAGGTGTCCACCCCGCCACCACCATGCGCATCCACCCTGGCCATGCCTGTTTACAAGAAAGCGGAGCACGTGACCGACGT	0.411647	21	0.166667	TP73	3.75148	4.23094	3.80376	4.34805	4.0671	3.94111	3.56398	4.308		4.0868	4.5874	3.82683	4.02414	3.82387				4.08661	3.60245	4.22049	3.60826					3.92312	4.08359		3.68434	4.63392	4.20064	4.13366	4.62228	4.246	4.5521	4.37854	3.61285	3.59842		4.45876
CDKN1A	28, 29, 49, 54, 62		TTCCTCATCCACCCCATCCCTC	CTGTCCATAGCCTCTACTGCCAC	TTCCTCATCCACCCCATCCCTCCCCAGTTCATTGCACTTTGGTTATCATCCTAACGAGTAGTCAGACATTTTAAGATGGTGGCAGTAGAGGCTATGGACAG	0.320292	23	0.0166667	CDKN1A	4.86536	5.25354	4.76426	5.08062	5.00902	4.22622	3.99811	4.97991	4.47592	5.37508	4.95547	4.64094	5.15288	4.65178	4.04736	4.89946		5.42563	5.60009	5.00389	4.73571	5.23813	5.14919	5.53393	4.89553	5.09546	5.13059	4.56042	4.85322	5.21626	4.73696	5.44583	5.58381	5.05571	4.76971	4.61802	5.05737	5.15884	4.24901	4.67583
CCND2	16		GAGTGAGGCAGCCCCGAGGC	GGGGGTTTTCGGGGGAGAGGT	GAGTGAGGCAGCCCCGAGGCTCTGCTCGCCCACCACCCAATACTCTCCCCTATTCCGCCCCACCTTCTCTCTCTGCCCTCACCTCTCCCCCGAAAACCCCC	0.307141	24	0.216667	CCND2	3.96255	3.926	3.99385	4.87251	4.33074	4.67188		4.8257		5.07263	4.34468	4.99501	4.95099	5.05391		5.93957		4.59368	4.11014	4.74725	4.492	4.44927				4.83913				5.0659		4.65311	5.01288	3.49965	5.37048	4.76448		4.60044		5.01029
CDKN1A-2	28, 29, 49, 54, 62		AGCAAGGCCTGCCGCCGCCT	CGCTCACGGGCCTCCTGGATG	AGCAAGGCCTGCCGCCGCCTCTTCGGCCCAGTGGACAGCGATCAGATGGGCAGCGGCTTTGATGCGCTAATGGCGGGCTGCATCCAGGAGGCCCGTGAGCG	0.258003	25	0.25	CDKN1A-2	4.19774	4.33705	4.30906	4.46222	3.93814	3.92715	3.82397	6.99803		3.59633								4.19554	4.22134		4.04115			5.02781		4.04537	4.61267	3.60478		4.5006		4.80377	4.44822	3.62695	5.01933	4.53076	3.95771	4.55183	4.61356	3.99221
CEBPA	33-35, 53-55		ACTGCGATGGGGGTCACCAGG	CCACCAGGGGTATACATCCTCAG	ACTGCGATGGGGGTCACCAGGTGACCAGTGGGAGCCCCCACACCGGGTAACGCCATAAGGCTAGGTCGTGGGTCAGCTCTGAGGATGTATACCCCTGGTGG	0.248223	26	0.3	CEBPA	3.89591	4.32214	3.85865	4.25221	4.57459	4.22358	4.59435	4.74157	4.32725		4.76141	4.35215						4.26963	5.0226	4.46879	3.79701	4.74303			3.79636	3.87955		4.52855			5.06398	3.60846	4.10722		3.89877	3.81231	4.31654	4.92031		4.98592
GSTM4	15		TGCCCTACTTGATTGATGGGGCT	CTCCTCTTCTGTCTCCCCACAC	TGCCCTACTTGATTGATGGGGCTCACAAGATCACCCAGAGCGACGACACCCCGTGATAAATTGCCCGCAAGCACAACCTGTGTGGGGAGACAGAAGAGGAG	0.199795	27	0.15	GSTM4	4.91081	4.4928	4.61932	4.51473	4.88759		4.6721	4.75681			4.43794	4.16241	4.08459	4.53906	4.16471			5.20097	4.71012	5.04061	4.21294	4.75907		4.46015	4.74275	3.93031			5.04929	4.67807	4.47499	4.53086	4.21473	4.99984	4.63696	4.74371	4.59936	4.41979	4.42263	4.66193
CAT	43		CAAATTACTACCCCAACAGCTTTGG	GGCAGTGTTGAATCTCCGCACTT	CAAATTACTACCCCAACAGCTTTGGTGCTCCGGAACAACAGACTTATGACCCGGATCAAAGCATCCAATATTCTGGAGAAGTGCGGAGATTCAACACTGCC	0.104422	28	0.05	CAT	4.04643	4.23889	4.53657	4.23011	4.58655	4.31259		4.59877	4.47267	4.63936	4.53803	4.54032	5.0277	4.19673		4.43943		4.36043	4.4309	4.68816	4.4685	4.97127	4.55416	3.79774	4.0085	4.73533	4.36101	4.55769	4.09801	4.52403	3.9435	4.487	4.5752	4.7448	5.11489	4.47783	4.56187	4.79426	4.10967	4.41387
ERCC1-2	14		AGGCAGCTCTGGCAGCTCCCA	ATCCGGCAGCTCAGGCCCCAC	AGGCAGCTCTGGCAGCTCCCAAAAAGAAGACGAAGAAAGAAGAACGGCGACGTGCAACGGTGGAGCCAGAGACAGAGGTGGTGGGGCCTGAGCTGCCGGAT	0.0877439	29	0.166667	ERCC1-2	4.25789	4.27712	4.54218	4.74406	4.61324	4.22748		4.57201		4.43746	5.62616		4.5221		4.53756	4.5797		4.18875	5.04659	4.22167	5.29846	4.136	4.84549			4.42992	4.78048	4.16036	3.65248	4.76645	4.23282	4.49512	4.45447	4.43807	5.79676	4.45119	4.47675	4.8188		5.2861
ERCC5	3, 9, 25		TTTTGGGGGAGACCTGCCTCTC	TTTCGCAGCTGTTCTCCTTTGTAC	TTTTGGGGGAGACCTGCCTCTCAGAATCATCTGATGGATCTCCAATTGGAGGTGCCGAGAGTTCATCTTTAATGAATGTACAAAGGAGAACAGCTGCGAAA	0.0617275		0.183333	ERCC5	4.35047	4.4516	5.56553	4.74319	4.67266	4.30702		4.95498		4.54825	4.7768	3.84821	4.68076	4.22184	4.72959				5.00679	5.15161	4.76359	4.64939	4.55768	3.6129	4.8812	4.37813		4.42926		4.47274		4.56495	4.34211	4.43068	5.76732	4.49263	5.20319	4.86256		5.518
EGFR	11		GGTCTGCCATGCCTTGTGCTCC	TGTCCACGCATTCCCTGCCTCG	GGTCTGCCATGCCTTGTGCTCCCCCGAGGGCTGCTGGGGCCAGGATCCAAGTGACCGCTTCTCTTGCCGGAATGTCAGCCGAGGCAGGGAATGCGTGGACA	0.0450044	30	0.183333	EGFR	4.72322	3.57887	4.16643	4.40615	4.66046	4.63423		4.8997	4.25981	4.78467	4.31292	4.59785	4.65301	4.45215					4.74115	4.52079	3.80315	4.18981	4.90161			4.28098		4.56312	4.5132	4.34572		4.27691	4.00939	4.333	4.92476	4.91244	4.04344	3.94556	5.04614	5.36022
MYC	28		GCCTTCTCTCCGTCCTCGGATT	GTGGTGGGCGGTGTCTCCTCA	GCCTTCTCTCCGTCCTCGGATTCTCTGCTCTCCTCGACGGATTCCCCCACGAAGGTCATCCCCGAGCCCCTGGTGCTCCATGAGGAGACACCGCCCACCAC	0.0334477	31	0.283333	MYC	3.99053	3.6238	3.58279	3.88076	4.01205	3.60372	3.70684	3.67524		3.08547	3.84478		3.65884		4.31991	4.006			3.98614							3.81055			3.01566	4.13576		3.24608	4.52036	2.62372	5.03605	3.25253	3.71183	4.27291		4.50332
BCL2	19		GCCGGGGAGGTCTGGCTTCAT	CTTTCTCATGGCTGTCCTTCAGG	GCCGGGGAGGTCTGGCTTCATACCACAGGTTTCCTGCTTTCCTGGCGGGGGTTAATCAACACTGCATTTCAGGAAGACCCTGAAGGACAGCCATGAGAAAG	N/A	N/A	0.683333	BCL2			3.54997	3.49866	3.9437			3.69574		3.18863	4.54669	3.85051							3.83293										3.98217				4.27585		3.3744	3.81858
BCL2-2	19		TGCCGAGAAAAGCATTTTAGCAATTT	TGGGAGTTGGGGGGTGCGTATC	TGCCGAGAAAAGCATTTTAGCAATTTATACAATATCATCCATTACATTGAGACCTTATCGTGTATATTCATATATTTTGGATACGCACCCCCCAACTCCCA	N/A	N/A	0.783333	BCL2-2					3.72308	3.67234		3.6107		4.21251	3.97247									4.06124	3.9394				3.7796	3.04851
BCL2-3	19		GACAGCTTATAATGGATGTACTTCAT	TTGGCCCCCGTTGCTTTTCCTC	GACAGCTTATAATGGATGTACTTCATCACTATCTCCCGGTTGTCGCACACATTTCCCCAAGCGTGCGCCATCCTTCCCAGAGGAAAAGCAACGGGGGCCAA	N/A	N/A	0.766667	BCL2-3	3.75155		3.7702	4.1081	4.25602			3.61238		3.7702		3.19236							3.86144	4.47298						3.64264												3.35235
BRCA1	16		CACAGCCACTACTGACTGCAGC	GTGAGAGGAGCTCCCAGGGCC	CACAGCCACTACTGACTGCAGCCAGCCACAGGTACAGAGCCGCAGTACACCGAGAGTGGGCTTACAAAGTGGCCTTTCCAGGCCCTGGGAGCTCCTCTCAC	N/A	N/A	0.766667	BRCA1	3.78244	3.43773	3.86953																						4.08719								3.89341	3.10101			3.17583
BRCA1-2	16		TGAAAATGACATTAAGGAAAGTTCTGC	GAGCCAAATGTGTATGGGTGAAAG	TGAAAATGACATTAAGGAAAGTTCTGCTGTTTTTAGCAAAATCGTACATAAGGGATAGATTAGCAGGAGTCCTAGCCCTTTCACCCATACACATTTGGCTC	N/A	N/A	0.75	BRCA1-2	4.38574		4.71831					3.37831				4.13574	3.88048									3.85318																4.09004
BRCA2	16		TATCTGAAGTGGAACCAAATGATACT	TACAACTTCCTTGGAGATTTTGTCAC	TATCTGAAGTGGAACCAAATGATACTGATCCATTAGATTCAGATGCAGAATGTCATAATCCCTTTGAGAGTGGAAGTGACAAAATCTCCAAGGAAGTTGTA	N/A	N/A	0.816667	BRCA2					4.91646					3.14526	4.63991	3.91781							3.46555			4.86731				3.36638
BRCA2-2	16		ACTATATTAGAAGAATCAGGAAGTCAG	ATCTGGTTTTCAGGCACTTCAAATG	ACTATATTAGAAGAATCAGGAAGTCAGTTTGAATTTACTCATTTTGGAGAAACAATCTGCATATTGCAGAAGAGTACATTTGAAGTGCCTGAAAACCAGAT	N/A	N/A	0.9	BRCA2-2								3.98144														3.93137
CCND2-2	16		CATCTGCAAAGGGCCCTTTCATC	TAGGAAACCTGCAGAGATGATCCT	CATCTGCAAAGGGCCCTTTCATCTTGAAGTTTTTCCCCTCCTTCTCTCACCCCCCATGTCATGGACACCTTGTGTTTAGGATCATCTCTGCAGGTTTCCTA	N/A	N/A	0.5	CCND2-2	3.9767	3.11436	4.44057	3.18092	4.81833				3.89691	5.64023	4.74966	3.91932	4.57167						4.01697	4.79496	3.86802		4.29017			3.64525							4.47519			4.30104		4.40438		4.40573
CCND2-3	16		TTTCCCTTCCCCTGGCATGGAC	TAAACGCTGCTTGCTGCAGGTTC	TTTCCCTTCCCCTGGCATGGACACCTTGTGTTTAGGATCATATCTTCATGTCTCCCAGTTCTGAATCTGCGAGTAGATGAACCTGCAGCAAGCAGCGTTTA	N/A	N/A	0.35	CCND2-3	3.6228	3.1332	3.78061	3.39611	4.19609	2.28939		3.11823	3.52773	4.53796	4.35302	4.17075	4.68599							3.9189		3.72883	4.53327			4.26135		4.17927		5.11283	4.26603		4.50193	3.12865		4.83032	3.86769	4.4367		4.6574
CEBPB	34,35, 52, 55, 56		TGCAAGAAGCCGGCCGAGTACG	GGCGGTGGGTGCAGGGGCG	TGCAAGAAGCCGGCCGAGTACGGCTACGTGAGCCTGGGGCGACTGTGGTCCTCCAGGGTCGCGCTGCACCCCGGCTGCTTCGCGCCCCTGCACCCACCGCC	N/A	N/A	0.833333	CEBPB				2.74361															3.12089				3.22917									3.06205	3.1439	2.50159
CEBPG-2	8, 34, 35, 33, 34, 56, 58, 59		AGGAGACAGGATAGGGGTTTCTAG	TGTCCTGGCTAGTTTTTCAAAACATC	AGGAGACAGGATAGGGGTTTCTAGGGTCCAACACCAGCTTAACTTTGATTACGAACCTGCCCATGAAGGATGAGAGATGTTTTGAAAAACTAGCCAGGACA	N/A	N/A	0.483333	CEBPG-2	4.46208		5.01682	3.71766	4.01864			4.3391	4.85982	4.42538	4.62809	3.17602							3.93538	3.85046	4.33099	4.25246			3.92646	3.80372						3.92808	4.9529		4.46652	4.70391		3.43074	4.16093	4.67693
CEBPG-3	8, 25, 26, 33, 34, 56, 58, 59		TGATGCCTTAGGAGAATTGTTTTGTT	AACAAGTTAGTACTTTTTCCTGAGAG	TGATGCCTTAGGAGAATTGTTTTGTTTCACAAAAGCTGGGAGGGAGGAGGTACATCCTTCAGCTGTTAGATCTGCCTCTCAGGAAAAAGTACTAACTTGTT	N/A	N/A	0.35	CEBPG-3		3.75341	5.14812	4.33933	4.00682	3.86554		4.61292		5.68091	5.13206	4.33136	5.50875						4.56107	4.53673	6.00683	4.55894		5.19495	4.9075	4.58804				5.96202		3.18073			7.18647	4.05265	5.63721	4.89131		4.46861
CYR61	17		ACTGCCAAGGGTGCTGGTGC	GCTCCAAAATGAAGCAGTAACATGTGCTC	ACTGCCAAGGGTGCTGGTGCGGGTGGGCACCAATTCAGACACTATTGGAGAATACTTTGCTTCATAGTATTGGAGCACATGTTACTGCTTCATTTTGGAGC	N/A	N/A	0.533333	CYR61	4.48377	3.25696	5.0691	3.88628		3.92962		3.51733	3.97707	5.12417			4.80036					4.93652	4.23582													5.31972	4.55907		3.37421			5.19525		4.30106
E2F1	9, 25, 28		GCAGAGCAGTGGGGAGGCAGG	CTTCACTGATGTGGGCAGGAGG	GCAGAGCAGTGGGGAGGCAGGCGCTTCAGACACTGCAGGAGTGACAACGGCTTCTTGGATGGGGGAGGCCTTCACCACCCCTCCTGCCCACATCAGTGAAG	N/A	N/A	0.616667	E2F1	3.21541		3.83415	3.02589	3.12709	2.62032													3.21377	3.61046			3.79961			3.35873			4.298			3.37036			3.88952	3.10936	3.22926	3.19346
E2F3	16		ATAAGTCTTAAAAGTTCCTTCATGCAT	TAATGCAAACAAAATACAGTATGGACA	ATAAGTCTTAAAAGTTCCTTCATGCATAAGATTTTTTTCCATTTAATGTGCCTAAATGTTGTACATTAATTAGATGTCCATACTGTATTTTGTTTGCATTA	N/A	N/A	0.833333	E2F3		4.23814	6.21991		3.90804		4.05675			3.14823												5.58976
ERCC4	18		TAACAGTCTTAATTGCACTTATACCC	TTTCCTACACAAACATCAGTTCAAGC	TAACAGTCTTAATTGCACTTATACCCATGTCCTGTGGCTCTACAAGTCCGGCCTTCGCCGTTGTGTCTGCTGGACGCTTGAACTGATGTTTGTGTAGGAAA	N/A	N/A	0.616667	ERCC4			4.62367	5.53345	4.83218		3.9338	4.4631	4.76061	4.41185	3.87136	4.17554	3.44971						3.74113	4.88481		3.92037		4.33669		4.43203									5.37085		4.72472	4.1827
ERCC4-2	18		CAGACTTCCTCGTTTCTCAGCTC	GTGCAGTGGTGCGATCTCGGC	CAGACTTCCTCGTTTCTCAGCTCTTATATCCTAAGACACCATCATAATGTCATCTGGAGATACAACCTAATTGGCAGTGAGCCGAGATCGCACCACTGCAC	N/A	N/A	0.5	ERCC4-2	4.09788		4.11829	4.2047	4.40182	3.87338													4.68238		4.49965	4.10518			3.91762	4.0054	4.46772					4.73937	3.70451	4.46065	4.60095	4.38725	4.53636	4.31142	4.50655	4.09054
ERCC5-2	3, 9, 25		GGGAGAGAGCCCACAGACTCAG	CTGTCCTTAATCATAGACTCATCAC	GGGAGAGAGCCCACAGACTCAGTTCCAAAAGAACAAATGTCGCTTTTTAACTTGGTGAATGAAGCCTTTCCGATAAGTGATGAGTCTATGATTAAGGACAG	N/A	N/A	0.333333	ERCC5-2	4.30919	3.33461	5.40891	4.32475	4.72249		4.09688	4.21858	4.16116	4.38831	4.56089	4.00933	4.46102	4.83455					3.78948	4.35269		4.56011		4.10139	3.3118	3.9765		4.1112				4.04059	3.90554	3.59342	5.17585	4.27682	4.42042	3.94172
ERCC5-3	3, 9, 25		GATATTAGCATTTGGTTAAACCAAGC	CAGAGCCGATGAAACAAAGTGAGA	GATATTAGCATTTGGTTAAACCAAGCACTTAAAGGAGTCCGTGATAGCAACTGGAGCTAAATAGAAAATCCTCATCTTCTCACTTTGTTTCATCGGCTCTG	N/A	N/A	0.35	ERCC5-3	4.94071	4.31883	4.46683		5.49049	3.21825		3.87709	3.57015	4.38031	3.99953	3.81508	4.55605		4.88167				3.17703	4.21564	4.26556	3.23923	4.50584			3.18231	4.54567	3.49763				4.27961	3.7081	4.29489	4.82563	4.11736	4.17407	4.35905
GSTM4-2	15		GAAGAGGCCATGGTTTGCAGGAG	CGTCCAAGCACTTGGGCTCAAAT	GAAGAGGCCATGGTTTGCAGGAGACAAGATCACTTTTGTAGGTTTACTAGTATATTATTTCCTTGACCTCCACCGTATATTTGAGCCCAAGTGCTTGGACG	N/A	N/A	0.483333	GSTM4-2	3.99271	3.93392		3.70744	3.68223			3.66785		4.27822	4.76755			4.18608					3.55973	3.52412	2.92023		4.34562		4.24317	3.71432	3.74007	4.13071	4.34842					3.22213		3.33572	3.37495	4.12475		4.91546
MYC-2	28		CGCGGCCGCCACCGCCGG	CCTCCCTCCGTTCTTTTTCCCG	CGCGGCCGCCACCGCCGGGCCCCGGCCGTCCCTGGCTCCCCCCCTTCCCCGGGAATGGAAGGGCTTCTCAGAGGCTTGGCGGGAAAAAGAACGGAGGGAGG	N/A	N/A	0.916667	MYC-2			2.81456	3.5142																													3.86813
MYC-3	28		TATAAAAGCCGGTTTTCGGGGCTT	GCCCGGCTCTTCCACCCTAGC	TATAAAAGCCGGTTTTCGGGGCTTTATCTAACTCGCTGTAGCAATCCCGGCTAGATGCGGAGGGAGCGAGCGGGCGGCCGGCTAGGGTGGAAGAGCCGGGC	N/A	N/A	0.816667	MYC-3	3.97279			4.01932				3.65407		4.11168	4.33737																						3.88178				3.85708
MYC-4	28		CCAGCAGCCTCCCGCGACGA	CCTCGTCGCAGTAGAAATACGGC	CCAGCAGCCTCCCGCGACGATGCCCCTCAACGTTAGCTTCAACAAAAGTAAATATTACATCGACTACGACTCGGTGCAGCCGTATTTCTACTGCGACGAGG	N/A	N/A	0.516667	MYC-4																		4.37739	5.34458		4.02001	4.95395	4.93907			4.29694	4.78794	4.65192	4.07526		4.89203	3.85533	5.26186	4.19652	5.08211	4.20984	4.2198	4.18175	4.7232	4.85549
NFE2L2	39, 50		AATTTCTCCCAATTCAGCCAGCCC	CCATAACTTTCCCAAGAACTGAGTA	AATTTCTCCCAATTCAGCCAGCCCAGCACATCCAGTCAGAAGCCATTGTATATGCAAAATACTCCCAGGTACAGAGTACTCAGTTCTTGGGAAAGTTATGG	N/A	N/A	0.566667	NFE2L2	3.53197		5.26154	4.28948	3.81216	4.14399		3.90775	4.9675	4.51839									3.8127	3.57545	3.39175					3.64459									5.3225	4.1896	3.7686
OGG1	36, 40		AGACTGAGGAGCAGCTCCACTG	CTGGAAGTANTTGCGCACGGCCT	AGACTGAGGAGCAGCTCCACTGCACTGTGTACCGAGGAGACGAGATCCGGGATAGAAGTCCCACACCAGACGAGCTGGAGGCCGTGCGCAANTACTTCCAG	N/A	N/A	0.433333	OGG1		4.61071	4.31214	4.59067	3.85065	2.66942	3.8367	3.42514			4.28609		4.36694						4.20022		3.09854	4.07974				4.382				3.05345		4.68741	4.52234	3.90507	4.39941	4.34966	4.13864			4.54618
OGG1-2	36, 40		TCTTTGGGCGTCGACGAGGCC	CATGCGCCTGGGCAGAAGCGC	TCTTTGGGCGTCGACGAGGCCTGGTTCTGGGTAGGCGGGGCCACTGCGTGGAGGTTCCCGCTGTGGAAATGCCTGCCCGCGCGCTTCTGCCCAGGCGCATG	N/A	N/A	0.35	OGG1-2	3.9166	3.24769	4.28915	4.06426	3.46634	3.16927		4.22084		4.53325	3.98586							4.31365	3.89063									4.23052	4.10531	4.52083	4.16552	4.01335	3.87832	3.82907		3.8065	3.95216	3.67907
OGG1-3	36, 40		CCGAGCCATCCTGGAAGAACAG	CTCCAGGCAGGATGCAGAGGG	CCGAGCCATCCTGGAAGAACAGGGCGGGCTAGCCTGGCTGCGGCATCTGCGGGAGCCCCCATATGAGGAGGCCCACAAGGCCCTCTGCATCCTGCCTGGAG	N/A	N/A	0.416667	OGG1-3	4.27014	4.02554	4.49243	4.07243	3.68824	3.93029		4.83644		4.31833	4.48567	5.03089	4.45742						3.80241	4.25388				4.28262		3.86169		4.35577		5.00503		4.0701		3.66973		4.02947	4.0349
OGG1-4	36, 40		AAGAGCCAGGCTAGCAGGCCC	GAACCCCAGTGGTGATACAGTTG	AAGAGCCAGGCTAGCAGGCCCACACCAGACGAGCTGGAGGCAGTGAGCGAGCACTCCCGGCTAGATGTTACCCTGGCTCAACTGTATCACCACTGGGGTTC	N/A	N/A	0.333333	OGG1-4		3.95335	3.68465	4.30799	3.66078	3.50064		3.59511		4.49493	4.51574				4.77488					3.28264	3.38141	3.399	3.89042			4.08407			4.11172	6.2737	4.16024	3.63436	4.2221	4.08146	4.30664	4.48134	3.85027			4.2883
RB1	16		TGGAACAGATTTGTCTTTCCCATGG	AGTTGCCTTCTGCTTTGATAAAACTT	TGGAACAGATTTGTCTTTCCCATGGATTCTGAATGTGCTTAGTTTGAAGGCATTTTATCTTTACAAAGTGATCGAAAGTTTTATCAAAGCAGAAGGCAACT	N/A	N/A	0.366667	RB1	3.91034	4.18981	6.06384	4.75982	4.68021			3.6924		5.47662	4.2199	3.72911	3.67197	3.80086					4.78841	4.33145	4.0407	4.28921			3.2551	4.61233						3.99326	5.2327		5.70163	5.09613	4.52596	3.61789
SOD3	24, 41-46		GCGTCTTCAGCTGTTTCGCATCC	AATTGCTGAATTTTTAATCTGTAACACA	GCGTCTTCAGCTGTTTCGCATCCACCGCCACCCCACTGAGATCTGATCATTCGGGTGAGTGTTTGGCAACCTTTGTGTTACAGATTAAAAATTCAGCAATT	N/A	N/A	0.716667	SOD3				3.80518		4.41522		4.35657		3.95629	4.72513								3.91466	3.31775		4.5966		4.27554		3.84047									5.67511			3.61025
SOD3-2	24, 41-46		GGGTTGCCTCGAGTCCCCCC	AGCTGAAGACGCGGGGCAGTTG	GGGTTGCCTCGAGTCCCCCCACCCCTCCCCACCCACCACCGATCCAGCTGCGAGCAAGACCGTGCAACGGAAGCCAGGCCAACTGCCCCGCGTCTTCAGCT	N/A	N/A	0.6	SOD3-2			2.87075	3.69775	3.82734	3.38763		3.86837							4.38167				3.66817				4.02655							4.58825		3.09623	3.03596	3.65646				3.54272
TP53-3	9, 48, 49		CAGCTGGTTAGGTAGAGGGAGTT	GGTGAGATTTCCTTTTAGGTACTAAG	CAGCTGGTTAGGTAGAGGGAGTTGTCAAGTCTCTGCTGGCCAAGCAAAGCCATGTATGGCAACCTCTTGGTGAACCTTAGTACCTAAAAGGAAATCTCACC	N/A	N/A	0.383333	TP53-3	5.68566	4.64799		5.01723	4.83644	2.58713		3.51548		3.95644	5.12897	3.90318	4.09301						4.43381	4.3398	5.02052	5.21946	4.64065	4.02959	4.91083	4.59513			5.03257		5.0983	3.92134	4.22584		4.76097	4.47554	4.06432	5.37837	5.29249
TP63-2	61-62, 65-70		CTATGTCAGTACTATTCAGGTAACAC	GTAAGCCAGTAAGGGTGCCTCG	CTATGTCAGTACTATTCAGGTAACACTAGGGCCTTGGAAATCCCTTTAATGCGTCCCACGGATTTGGCACTAGCCAAAGCGAGGCACCCTTACTGGCTTAC	N/A	N/A	0.483333	TP63-2	4.7633		4.7247	4.42997	5.56551			4.90707			5.52475	5.07438							4.74445	5.29099	5.35848		4.99826	4.87665	5.18309	5.46186			4.72623	4.61742			5.3451	4.4739	5.67187			6.24403		5.01254
TP63-3	61-62, 65-70		AAACCAGCCATATTACTGATACTGTT	CAGGAGTGCTGATTTTAACACGTC	AAACCAGCCATATTACTGATACTGTTCAGTGCATTTAGCCATGAGGCTCA-AGTTCTGGGTAAGTGAGATCCAAGCAGACGTGTTAAAATCAGCACTCCTG	N/A	N/A	0.833333	TP63-3			4.58605	3.96764						4.2016		4.83113	7.35372		4.89127					4.73791														4.36966						5.39956
TP63-4	61-62, 65-70		AAGCCCTCTCACAAAATCTGTGATT	CACTGAACAGTATCAGTAATATGGC	AAGCCCTCTCACAAAATCTGTGATTAATTTGCTTAATTAGATCTTATACCCATCAGGCATACCTACCATAAAACCAGCCATATTACTGATACTGTTCAGTG	N/A	N/A	0.933333	TP63-4					4.23861					4.20248			4.35902																									4.69897
XPA-2	14		TTACAACAGAGATGGGAGCTGAGT	TACCCCAATCTAGGGTTTGCCTTG	TTACAACAGAGATGGGAGCTGAGTGCTAGAGTAGGTGCAGAGGTGTTATGTAAGCCACGAATTTGAGGACAAGATACCAAGGCAAACCCTAGATTGGGGTA	N/A	N/A	0.8	XPA-2		3.21564	3.19683	3.43423		2.80987			4.47497																									3.46236	5.14504		3.21681	3.88939
[truncated: 20 more columns]

## Sheet: Table S2
Table S2. Population used for allele specific expression analysis: Summary demographic characteristics of the study population of allele specific expression (subject total n=180).
Age, yr (ave.)		63.132
Sex (n)
	Male	105
	Female	73
Smoking history (n)
	Current	56
	Former	105
	Never	1
Pack-Years (ave.)		50.848
Ethnicity (n)
	White	150
	AA	19
	Other	2
Note: Missing data: age (n=2), sex (n=2), smoking history (n=18), ethnicity (n=9). AA: African American

## Sheet: Table S3
Table S3. Transcription factor-target inter-gene correlation in Control, COPD, or All subjects (p-value < 0.05).
p-value <0.05 in Control group
GENE1	GENE2	Non-COPD PEARSON (r )	Non-COPD p-VALUE
CEBPA	XPA	-0.524666	0.0369273
TP53	CEBPD	0.533589	0.0273884
TP53-2	KEAP1-2	0.559735	0.0126999
TP73	GPX1	0.472519	0.0410591
p-value <0.05 in COPD group
GENE1	GENE2	COPD. PEARSON (r )	COPD p-VALUE
CEBPD	ERCC5	0.643826	0.000686979
CEBPD	KEAP1	0.450066	0.023978
CEBPD	TP73-2	0.424914	0.0384732
KEAP1	CAT	0.586714	0.000821923
KEAP1	ERCC5	0.442679	0.0235325
KEAP1	KEAP1-2	0.396789	0.0365658
KEAP1-2	CAT	0.495163	0.00631324
TP53	GPX1	0.46492	0.016707
TP53-2	TP73-2	0.497863	0.00701839
TP73-2	TP73	0.562967	0.00223421
TP73-2	XPA	0.577792	0.0151349
TP73-2	ERCC5	0.45816	0.0243534
p-value <0.05 in all subjects
GENE1	GENE2	ALL PEARSON (r )	ALL p-VALUE
KEAP1	CAT	0.469771	0.000338529
CEBPD	ERCC5	0.311336	0.042131
CEBPG	GPX1	0.395782	0.00589235
ERCC5	KEAP1	0.402929	0.00451919
KEAP1	KEAP1-2	0.305494	0.0327957
TP53-2	GPX1	0.317914	0.024458
TP53-2	KEAP1-2	0.309735	0.0321664
TP73	GPX1	0.416059	0.00362945
TP73	TP73-2	0.391297	0.0125338
TP73-2	CEBPD	0.496228	0.00131433

## Sheet: Table S4
Table S4. Analysis of covariance (ANCOVA). Gene expression values (Independent Variables) significantly correlated (positively or negatively) with COPD subjects (Dependent Variable) after control for expression values of other genes (Covariates).
Independent Variable (IV)	Covariate	Association of IV with COPD	p-value
CEBPG	GSTM4	Higher	0.03517
CEBPG	TP63	Higher	0.04703
GPX1	GSTP1	Higher	0.04875
GPX1	KEAP1-2	Higher	0.04916
GPX1	TP53	Higher	0.02303
KEAP1	CAT	Lower	0.0056126
KEAP1	CCND2	Lower	0.03435
KEAP1	CDKN1A	Lower	0.01911
KEAP1	CDKN1A-3	Lower	0.03459
KEAP1	CDKN1A-4	Lower	0.01372
KEAP1	ERCC1	Lower	0.009293
KEAP1	ERCC5	Lower	0.018267
KEAP1	GPX1	Lower	0.0103
KEAP1	GSTT1	Lower	0.0035341
KEAP1	MUC5B	Lower	0.01654
KEAP1	MUC5B-2	Lower	0.01531
KEAP1	TFE3	Lower	0.01265
KEAP1	TP53-2	Lower	0.008277
KEAP1	TP53	Lower	0.02764
KEAP1	TP73	Lower	0.02912
KEAP1	XRCC1	Lower	0.02109
TP73-2	CAT-2	Higher	0.02381
TP73-2	CDKN1A-2	Higher	0.01267
TP73-2	CDKN1A-3	Higher	0.01183
TP73-2	CDKN1A-4	Higher	0.01017
TP73-2	MUC5B-2	Higher	0.02664

## Sheet: Table S5
Table S5. ERCC5 SNPs linked to rs17655 and rs873601 (D>0.95) and with p<0.05 in LHS and COPDgene NHW CB cohorts. COPD GWAS p-values, population-specific genotype frequencies, and epigenetic annotation information from Haploreg/Encode.
Query SNP	HaploView & HaploReg Linked SNP	D'	LHS p-val CB	NHW p-val CB	hg38 position	dbSNP func. Annot	Promoter histone marks	Enhancer histone marks	DHS	Proteins bound	Predicted Motifs changed	Selected eQTL hits
rs17655	rs2296148	1	0.01027	0.006154	13:102846195	5'-UTR	24 tissues		37 tissues	4 bound proteins	CTCFL_disc1, ELF1_disc2, ETF, Rad21_disc5, Znf143_disc4	3 hits
	rs4150275	1	0.01833	0.004601	13:102854778	intronic		4 tissues	BLD,THYM			2 hits
	rs2227869	1	0.01833	0.007733	13:102862735	missense		BLD, LIV, MUS	BLD			2 hits
	rs4150321	1	N/A	0.008032	13:102863211	intronic
	rs4150358	1	0.03723	0.008748	13:102871999	intronic		6 tissues	MUS		GR
	rs732321	1	0.03723	0.008259	13:102872604	intronic		BRST, MUS			AP-1_disc7, DMRT2, ERalpha-a_disc4, GR_disc1
Note: CB: chronic bronchitis; NHW: Non-Hispanic white; LHS: Lung Health Study; hg38: Genome Reference Consortium Human Build 38; dbSNP: single nucleotide polymorphism database at NCBI; DHS: DNAse hypersensitivity site, indicating DNA "opened" by transcription protein binding and actively transcribed; Predicted motifs changed: empirically derived algorithm used to predict altered binding of transc…

## Sheet: Table S6
Table S6. Haplotype structure between COPDgene NHW1 associated SNP rs4150275, putative functional cis-rSNP rs873601, and DAE2 SNP rs17655.
Haplotype frequency	rs4150275		rs873601		rs176557
EUR3	Genotype	CB4 Risk	Genotype	miRNA binding	Genotype	BEC5 Expression
0.05	A	Higher	G6	Higher	C	Lower
1NHW, Non-Hispanic White, 2DAE, differential allelic expression, 3EUR, European, 4CB, chronic bronchitis, 5BEC, bronchial epithelial cells, 6rs873601 G allele transcript is putatively more responsive to multiple miRNA, 7rs17655 data were reported previously reported.
